# Supplementary material for: Safety reporting of Essure medical device: a qualitative and quantitative assessment on the FDA manufacturer and user facility device experience database in 2018
Source: Front Reprod Health. 2023 Jul 13;5:1172927. doi: 10.3389/frph.2023.1172927 (PMC10374426; doi:10.3389/frph.2023.1172927)
Supplement: Supplementary file 1 [file Table1.docx]

Supplementary Material

Safety Reporting of Essure Medical Device: A Qualitative and Quantitative Assessment on the FDA Manufacturer and User Facility Device Experience Database in 2018

Chenyu Zou1*, Brandy Davis1, Patricia R. Wigle2, Ana L. Hincapie2, Jeff Jianfei Guo2

1Department of Health Outcomes Research and Policy, Harrison College of Pharmacy, Auburn University, Auburn, AL, United States

2Division of Pharmacy Practice & Administrative Sciences, The James L. Winkle College of Pharmacy, University of Cincinnati, Cincinnati, OH, United States

*** Correspondence:**Chenyu Zou, MS, Ph.D. Candidate
czz0063@auburn.edu

# Supplementary Tables

**Supplementary Table 1.** Reported Device Problems Associated with Essure Medical Device among 500 Randomly Selected Cases in 2018

| **Device Problem Reported** | **N (%)** |
| --- | --- |
| Adverse Event Without Identified Device or Use Problem | 187 (37.40) |
| Activation Failure Including Expansion Failures | 1 (0.2) |
| Appropriate Term/Code Not Available | 1 (0.2) |
| Biocompatibility | 24 (4.80) |
| Break | 13 (2.60) |
| Expulsion | 2 (0.40) |
| Device Appears to Trigger Rejection | 6 (1.20) |
| Failure to Advance | 1 (0.20) |
| Insufficient Information | 23 (4.60) |
| **Total** | **258** |

**Supplementary Table 2.** Ten Reported Death Cases Associated with Essure Medical Device Identified from the FDA MAUDE Database in 2018

| Death Report No.1 | |
| --- | --- |
| **Report Number** | 2951250-2018-00373 |
| **Event Date** | 07/03/2011 |
| **Event Type** | Death |
| **Date Received** | 01/15/2018 |
| **Device Problem** | Device dislodged or dislocated; adverse event without identified device or use problem; insufficient information |
| **Date of death** | 2016 |
| **Report Source** | Manufacturer |
| **Adverse Event** | Patient’s death |
| **Treatment** | Amitriptyline, Hydrocodone, Iron, Levothyroxine, Nexium Sandoz, Phenergan, Prevacid, Promethazine, Xanax, Zoloft |
| **Cause of Death** | Deep vein thrombosis |
|  | |
| Death Report No.2 | |
| **Report Number** | 2951250-2018-00557 |
| **Event Date** | N/A |
| **Event Type** | Death |
| **Date Received** | 02/09/2018 |
| **Device Problem** | Adverse Event Without Identified Device or Use Problem |
| **Date of death** | Unknown |
| **Report Source** | Manufacturer (This spontaneous case was posted on a Facebook page and refers to an unspecified female consumer) |
| **Adverse Event** | Patient’s death |
| **Treatment** | Not mentioned |
| **Cause of Death** | Not mentioned |
| Death Report No.3 | |
| **Report Number** | 2951250-2018-00624 |
| **Event Date** | N/A |
| **Event Type** | Death |
| **Date Received** | 2018/02/13 |
| **Device Problem** | N/A |
| **Date of death** | 2015 |
| **Report Source** | Manufacturer (This spontaneous case was reported by a lawyer) |
| **Adverse Event** | Intra-abdominal haemorrhage  Seriousness criteria death, medically significant and intervention required; Device dislocation; seriousness criteria medically significant and intervention required |
| Patient’s death |
| **Treatment** | Surgery (Hysterectomy) |
| **Cause of Death** | Intra-abdominal bleeding |
| Death Report No.4 | |
| **Report Number** | 2951250-2018-01279 |
| **Event Date** | 2010/01/14 |
| **Event Type** | Death |
| **Date Received** | 2018/03/27 |
| **Device Problem** | N/A |
| **Date of death** | 2017 |
| **Report Source** | Manufacturer (This spontaneous case was reported by a lawyer) |
| **Adverse Event** | Uterine perforation (seriousness criterion medically significant) with pelvic pain and abdominal pain lower. Genital haemorrhage (seriousness criterion medically significant) |
| Menorrhagia (increased bleeding during menstruation) |
| Vaginal haemorrhage, vaginal discharge and vaginal infection |
| Cstitis (infection bladder) and bladder disorder with bladder pain; Urinary tract infection and urinary tract disorder |
| Dysmenorrhoea, emotional distress, migraine, rash, back pain, fatigue, nervous system disorder (neurological conditions or problems), renal pain, tooth disorder, weight decrease |
| Patient’s death |
| **Treatment** | Not mentioned |
| **Cause of Death** | Incident due to a uterine perforation during Essure insertion procedure. |
| Death Report No.5 | |
| **Report Number** | 2951250-2018-02103 |
| **Event Date** | N/A |
| **Event Type** | Death |
| **Date Received** | 2018/05/08 |
| **Device Problem** | Break |
| **Date of death** | Undisclosed |
| **Report Source** | Manufacturer |
| **Adverse Event** | Procedural intestinal perforation (seriousness criterion death) |
| Pain (seriousness criteria medically significant and intervention required), Device breakage (seriousness criteria medically significant and intervention required); Complication of device removal (metallic Essure remains from first surgery) |
| Malaise (seriousness criterion medically significant) |
| **Treatment** | Surgery (procedure to remove Essure (first time)) |
| Surgery (laparoscopy/bilateral total salpingectomy and underwent to a bilateral total salpingectomy to remove metallic Essure remains (second time) |
| **Cause of Death** | A severe intestinal perforation during the second surgery |
| Death Report No.6 | |
| **Report Number** | 2951250-2018-02435 |
| **Event Date** | N/A |
| **Event Type** | Death |
| **Date Received** | 06/01/2018 |
| **Device Problem** | N/A |
| **Date of death** | Not mentioned |
| **Report Source** | Manufacturer (This spontaneous case was reported by a lawyer) |
| **Adverse Event** | Medical device removal (seriousness criteria medically significant and intervention required) |
| Mbolism (seriousness criterion death) |
| Malaise |
| **Treatment** | Surgery (Hysterectomy) |
| **Cause of Death** | Embolism |
| Death Report No.7 | |
| **Report Number** | 2951250-2018-02815 |
| **Event Date** | N/A |
| **Event Type** | Death |
| **Date Received** | 06/26/2018 |
| **Device Problem** | N/A |
| **Date of death** | Not mentioned |
| **Report Source** | Manufacturer (This spontaneous case was reported by a lawyer) |
| **Adverse Event** | Medical device removal (seriousness criteria medically significant and intervention required) |
|  | Mbolism (seriousness criterion death) |
|  | Malaise |
| **Treatment** | Surgery (Hysterectomy) |
| **Cause of Death** | Embolism |
| Death Report No.8 | |
| **Report Number** | 2951250-2018-02989 |
| **Event Date** | N/A |
| **Event Type** | Death |
| **Date Received** | 07/06/2018 |
| **Device Problem** | N/A |
| **Date of death** | Unknown |
| **Report Source** | Manufacturer (This spontaneous case was reported by a lawyer) |
| **Adverse Event** | Fatal infection (baby died shortly after birth due to an infection due to Essure) |
| **Treatment** | Not mentioned |
| **Cause of Death** | Infection |
| Death Report No.9 | |
| **Report Number** | 2951250-2018-03413 |
| **Event Date** | N/A |
| **Event Type** | Death |
| **Date Received** | 08/09/2018 |
| **Device Problem** | N/A |
| **Date of death** | 2017 |
| **Report Source** | Manufacturer (This spontaneous case was reported by a lawyer) |
| **Adverse Event** | Pelvic pain (seriousness criteria medically significant and intervention required) |
| Genital haemorrhage (seriousness criterion medically significant) |
| Cervix carcinoma (seriousness criterion death) |
| Salpingitis (seriousness criteria medically significant and intervention required) |
| Fallopian tube perforation (seriousness criteria medically significant and intervention required) |
| **Treatment** | Chemotherapy and surgery (left salpingo-oophorectomy and Essure was removed) |
| **Cause of Death** | Cervical cancer |
| Death Report No.10 | |
| **Report Number** | 2951250-2018-03728 |
| **Event Date** | N/A |
| **Event Type** | Death |
| **Date Received** | 08/27/2018 |
| **Device Problem** | N/A |
| **Date of death** | Not mentioned |
| **Report Source** | Manufacturer |
| **Adverse Event** | Device dislocation (seriousness criteria medically significant and intervention required) |
| Fetal death (seriousness criterion medically significant) |
| Autoimmune disorder (seriousness criterion medically significant) |
| Pregnancy with contraceptive device (seriousness criterion medically significant) |
| **Treatment** | Surgery (body parts ripped and Essure was removed) |
| **Cause of Death** | Not mentioned |

**Supplementary Table 3.** Analysis of Available Clinical Trials Related to Essure Medical Devices Found on the Clinicaltrials.gov Website

| **Characteristic** | | **N. (%)** |
| --- | --- | --- |
| Status | Not yet recruiting | 1 (4.35) |
| Recruiting | 2 (8.70) |
| Enrolling by invitation | 1 (4.35) |
| Active, not recruiting | 4 (17.39) |
| Terminated | 1 (4.35) |
| Completed | 12 (52.17) |
| Withdrawn | 1 (4.35) |
| Eligibility Criteria | Accepts Healthy Volunteers | 12 (52.17) |
| Not Accepts Healthy Volunteers | 11 (47.83) |
| Study Type | Interventional (Clinical Trial) | 12 (52.17) |
| Observational | 11 (47.83) |
| Study Results | With Results | 2 (8.70) |
| Without Results | 21 (91.30) |
| Study Phase | Phase 1 and Phase 2 | 1 (4.35) |
| Phase 3 | 1 (4.35) |
| Phase 4 | 1 (4.35) |
| Not Applicable | 20 (86.96) |
| Funder Type | Industry | 13 (56.52) |
| Individuals, Universities, Organizations | 10 (43.48) |
| Location | Europe | 8 (34.78) |
| Canada | 3 (10.71) |
| Mexico | 1 (4.35) |
| United States | 16 (69.57) |
